# Supplementary material for: Synthesis, growth and characterization of a third-order nonlinear optical crystal based on the borate ester with sodium supporting its structural framework
Source: Royal Society of Chemistry journal article supplement (doi:10.1039/c1nj20420c), 2011-01-01
Supplement: c1nj20420c.pdf [file c1nj20420c.pdf]

## Supporting information

### Synthesis, Growth and Characterization of a Third-order Nonlinear Optical Crystal Based on the Borate Ester with Sodium Supporting its Structural Framework

Zhihua Sun,<sup>†</sup> Tianliang Chen,<sup>†</sup> Ning-ning Cai,<sup>‡</sup> Jing-wei Chen,<sup>§</sup> Lina Li,<sup>†</sup> Yan Wang,<sup>†</sup>  
Junhua Luo,<sup>\*,†</sup> and Maochun Hong<sup>†</sup>

<sup>†</sup> *Key Laboratory of Optoelectronic Materials Chemistry and Physics, Fujian Institute of Research on the Structure of Matter, Chinese Academy of Sciences, Fuzhou, Fujian 350002, China*

<sup>‡</sup> *State Key Laboratory of Crystal Materials and Institute of Crystal Materials, Shandong University, Jinan 250100, China*

<sup>§</sup> *Department of Optics, Shandong University, Jinan 250100, China*

\* To whom correspondence should be addressed. E-mail: sunzhihua@fjirsm.ac.cn.

Tel: +86-591-83730955; Fax: +86-591-83730955

**Element analysis:** Calculated results are H: 3.96 B: 3.04 C: 53.97 O: 32.57 Na: 6.46;  
Experimental results are H: 4.02 B: 2.97 C: 54.20 O: 32.06 Na: 6.05

**NMR spectral data:** <sup>13</sup>C NMR (D<sub>2</sub>O, 298 K, TMS): 179.8, 177.9, 139.3, 137.5, 129.1, 129.0, 128.6, 127.1, 126.7, 126.6, 78.3, 78.1, 73.9;

<sup>1</sup>H NMR (D<sub>2</sub>O, 298 K, TMS): 7.47-7.37 (m, 5H), 5.45, 5.09 (m, 1H)

#### X-ray Crystallography

X-ray powder diffraction (XRPD) was used to characterize the grown bulk crystals. Experimental XRPD patterns have been proved to be well consistent with calculated values derived from the single-crystal data by the mercury program, which are shown in Figure S3. The detailed experimental values and indices are given in Table S2.

## Tables

**Table S1.** Selected bond lengths [ $\text{\AA}$ ] and angles [deg] for LMBNa crystal.

|            | Bond length |             | Bond length |             | Bond length |
|------------|-------------|-------------|-------------|-------------|-------------|
| B1-O1      | 1.456(3)    | B1-O2       | 1.497(5)    | B2-O10      | 1.441(3)    |
| B1-O4      | 1.430(3)    | B2-O7       | 1.438(5)    | B2-O11      | 1.492(3)    |
| B1-O5      | 1.498(3)    | B2-O8       | 1.511(5)    | B2-O7       | 1.440(3)    |
| Na1-O3     | 2.309(2)    | Na1-O14     | 2.315(4)    | Na3-O1      | 2.515(3)    |
| Na1-O5     | 2.759(3)    | Na2-O1      | 2.370(2)    | Na3-O10     | 2.269(3)    |
| Na1-O6     | 2.3960(2)   | Na2-O7      | 2.363(3)    | Na3-O13     | 2.338(7)    |
| Na1-O9     | 2.4376(2)   | Na2-O10     | 2.611(3)    | Na3-O14     | 2.222(7)    |
| Na1-O12    | 2.4966(2)   | Na2-O13     | 2.403(6)    | Na3-O7      | 2.363(3)    |
| Na1-O13    | 2.443(8)    | Na2-O14     | 2.315(4)    |             |             |
|            | Bond angle  |             | Bond angle  |             | Bond angle  |
| O4-B1-O1   | 113.71(19)  | O7-B2-O8    | 104.39(19)  | O14-Na1-O13 | 69.86(18)   |
| O4-B1-O2   | 113.98(19)  | O8-B2-O10   | 113.98(19)  | O13-Na2-O14 | 90.7(2)     |
| O1-B1-O2   | 104.3(2)    | O8-B2-O11   | 106.5(2)    | O10-Na2-O13 | 101.9(2)    |
| O4-B1-O5   | 105.2(2)    | O3-Na1-O6   | 83.22(7)    | O9-Na2-O14  | 81.69(12)   |
| O1-B1-O5   | 112.94(19)  | O6-Na1-O12  | 112.24(6)   | O10-Na2-O14 | 79.68(12)   |
| O2-B1-O5   | 106.71(13)  | O12-Na1-O9  | 79.35(6)    | O10-Na2-O15 | 100.79(17)  |
| O7-B2-O10  | 113.7(2)    | O14-Na1-O3  | 88.14(16)   | O14-Na2-O1  | 168.65(16)  |
| O11-B2-O7  | 113.91(18)  | O12-Na1-O14 | 64.45(13)   | O14-Na3-O1  | 117.8(2)    |
| O10-B2-O11 | 104.41(19)  | O5-Na1-O14  | 133.40(14)  | O14-Na3-O7  | 126.3(2)    |

**Table S2** The experimental  $d$  values (observed),  $2\theta$  (observed and calculated) and their diffraction indices for LMBNa crystal

| h | k | l  | $2\theta_{\text{obs}}$ | $2\theta_{\text{cal}}$ | $d_{\text{obs}}$ | h | k | l  | $2\theta_{\text{obs}}$ | $2\theta_{\text{cal}}$ | $d_{\text{obs}}$ |
|---|---|----|------------------------|------------------------|------------------|---|---|----|------------------------|------------------------|------------------|
| 0 | 0 | 2  | 7.448                  | 7.448                  | 11.8592          | 4 | 1 | -4 |                        |                        |                  |
| 1 | 0 | 1  |                        | 7.495                  |                  | 0 | 2 | 4  | 25.720                 | 25.720                 | 3.4609           |
| 1 | 0 | -3 |                        | 11.089                 |                  | 3 | 2 | -2 | 26.666                 | 26.666                 | 3.3403           |
| 0 | 0 | 3  | 11.182                 | 11.182                 | 7.9061           | 1 | 1 | 6  |                        | 16.766                 |                  |
| 2 | 0 | 0  |                        | 11.184                 |                  | 4 | 1 | 2  | 27.654                 | 27.654                 | 3.2232           |
| 2 | 0 | -2 | 11.672                 | 11.672                 | 7.5759           | 1 | 2 | -5 |                        | 27.671                 |                  |
| 1 | 1 | -1 | 11.903                 | 11.903                 | 7.4294           | 2 | 2 | -5 |                        | 28.378                 |                  |
| 2 | 0 | 1  |                        | 12.702                 |                  | 3 | 0 | 5  | 28.452                 | 28.452                 | 3.1346           |
| 0 | 1 | 2  | 12.779                 | 12.779                 | 6.9218           | 3 | 2 | -4 |                        | 28.544                 |                  |
| 1 | 1 | 1  |                        | 12.806                 |                  | 5 | 1 | -5 | 29.388                 | 29.388                 | 3.0367           |
| 1 | 1 | -2 | 13.129                 | 13.129                 | 6.7378           | 5 | 1 | -1 |                        | 29.388                 |                  |
| 0 | 0 | 4  |                        | 14.929                 |                  | 5 | 1 | -5 |                        | 29.452                 |                  |
| 2 | 1 | -1 | 14.977                 | 14.996                 | 5.9104           | 5 | 1 | 0  |                        | 29.455                 |                  |
| 2 | 0 | 2  | 14.996                 | 15.023                 | 5.9032           | 3 | 2 | -5 |                        | 30.171                 |                  |
| 1 | 1 | -3 | 15.204                 | 15.204                 | 5.8229           | 1 | 2 | -6 | 30.218                 | 30.218                 | 2.9552           |
| 0 | 1 | 3  |                        | 15.273                 |                  | 4 | 2 | -2 |                        | 30.256                 |                  |
| 2 | 1 | 0  |                        | 15.274                 |                  | 1 | 1 | 7  |                        | 30.261                 |                  |
| 3 | 1 | -1 | 19.284                 | 19.284                 | 4.5992           | 4 | 2 | -1 |                        | 30.304                 |                  |
| 3 | 0 | -4 |                        | 19.305                 |                  | 0 | 2 | 6  |                        | 30.825                 |                  |
| 3 | 1 | -2 | 19.502                 | 19.502                 | 4.5482           | 4 | 2 | 0  | 30.827                 | 30.827                 | 2.8982           |
| 3 | 1 | 0  | 19.790                 | 19.790                 | 4.4827           | 5 | 1 | -5 |                        | 31.302                 |                  |
| 3 | 1 | -3 | 20.422                 | 20.422                 | 4.3452           | 5 | 1 | 1  | 31.303                 | 31.303                 | 2.8553           |
| 2 | 1 | 3  | 20.680                 | 20.680                 | 4.2916           | 2 | 0 | 7  |                        | 31.349                 |                  |
| 0 | 2 | 1  | 21.161                 | 21.161                 | 4.1950           | 4 | 1 | 4  | 32.118                 | 32.118                 | 2.7846           |
| 0 | 0 | 6  | 22.473                 | 22.473                 | 3.9531           | 1 | 0 | 8  |                        | 32.141                 |                  |
| 4 | 0 | 0  |                        | 22.476                 |                  | 3 | 1 | -8 |                        | 32.173                 |                  |
| 1 | 2 | 2  |                        | 23.348                 |                  | 3 | 2 | -6 |                        | 32.179                 |                  |
| 1 | 1 | 5  | 23.401                 | 23.401                 | 3.7983           | 4 | 2 | -5 |                        | 32.888                 |                  |
| 2 | 1 | 4  |                        | 23.448                 |                  | 5 | 1 | -6 |                        | 32.894                 |                  |
| 1 | 1 | -6 | 24.062                 | 24.062                 | 3.6956           | 5 | 1 | 2  | 32.905                 | 32.895                 | 2.7198           |
| 4 | 1 | -2 |                        | 24.108                 |                  | 2 | 2 | -7 |                        | 33.285                 |                  |
| 2 | 2 | 1  | 24.467                 | 24.467                 | 3.6353           | 6 | 0 | -4 |                        | 33.296                 |                  |
| 1 | 0 | -7 | 25.351                 | 25.351                 | 3.5105           | 2 | 3 | -1 | 33.353                 | 33.353                 | 2.6843           |
| 2 | 0 | -7 |                        | 25.674                 |                  | 3 | 1 | 6  |                        | 33.424                 |                  |

## Figures

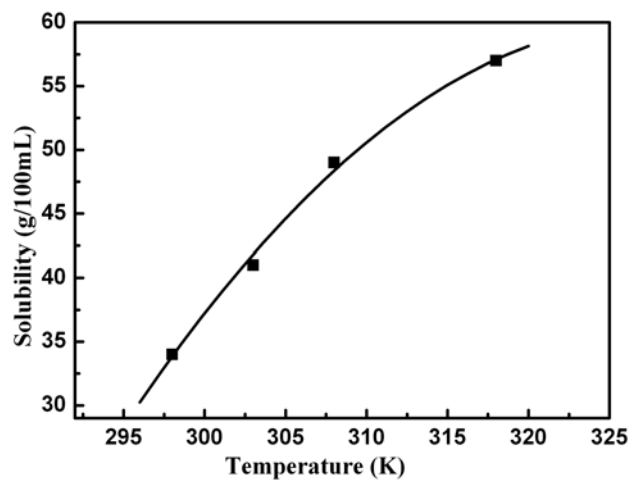

Figure S1. Solubility curve of LMBNa crystal in water

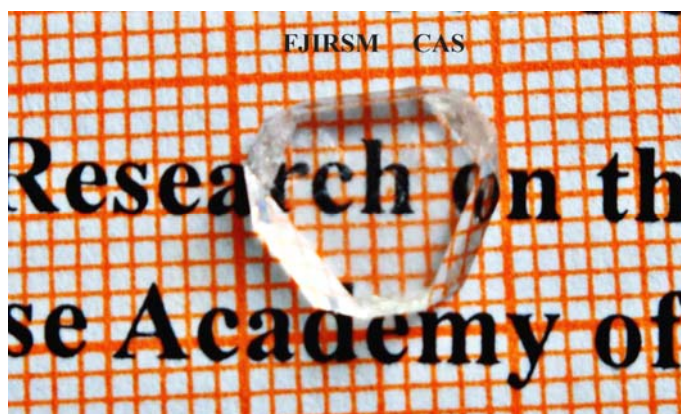

Figure S2. The grown LMBNa crystal with high quality.

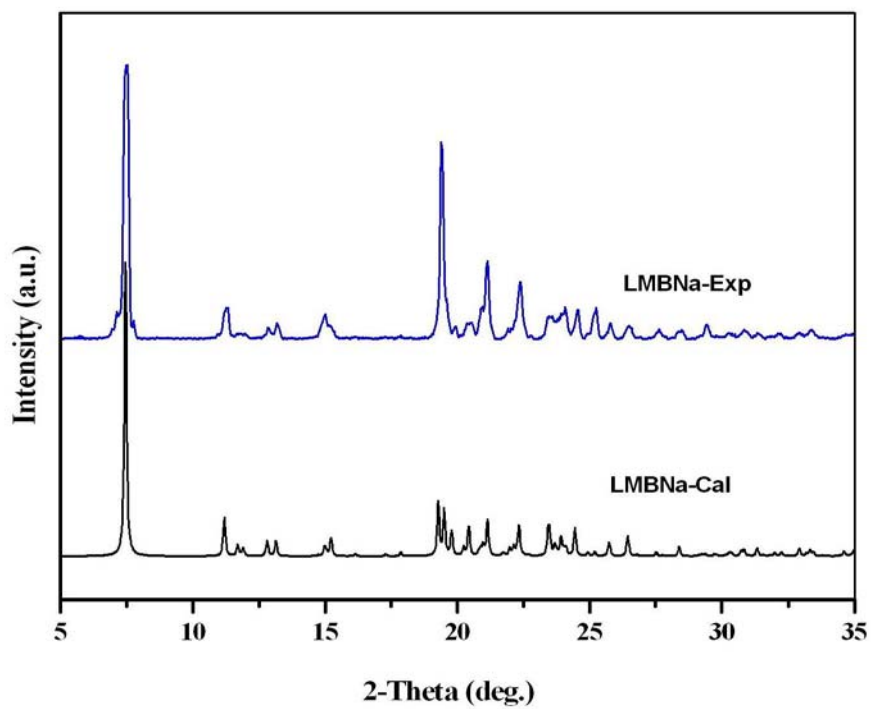

Figure S3. Experimental and calculated X-ray powder diffraction patterns.

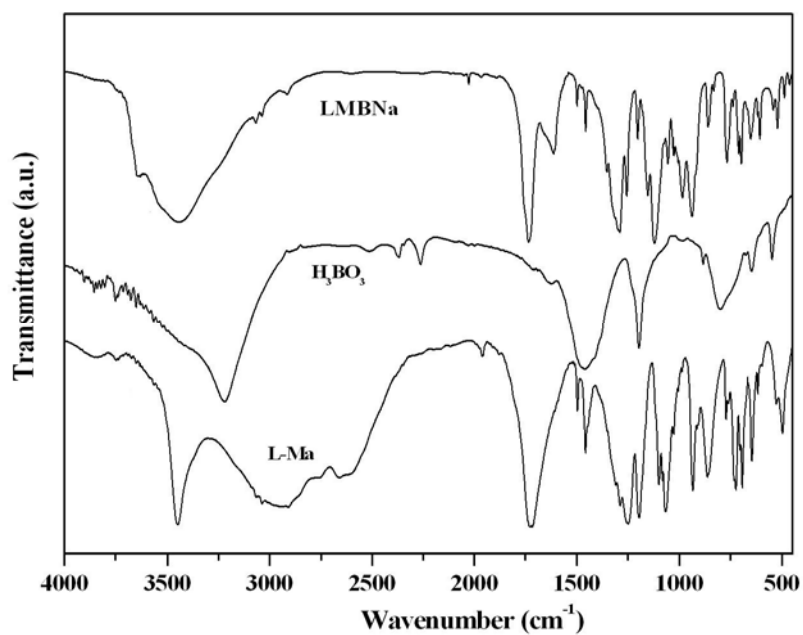

Figure S4. FT-IR spectra of LMBNa, H<sub>3</sub>BO<sub>3</sub> and L-mandelic acid (L-Ma).

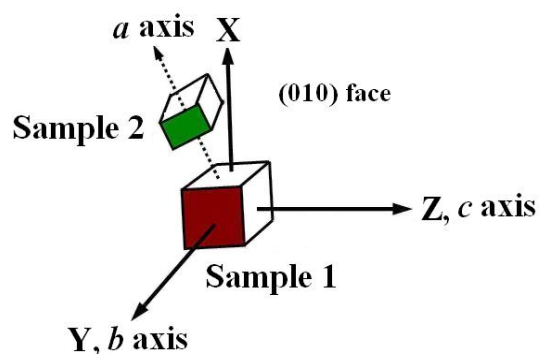

Figure S5. Schematic diagram of the samples for measuring the dielectric constant.

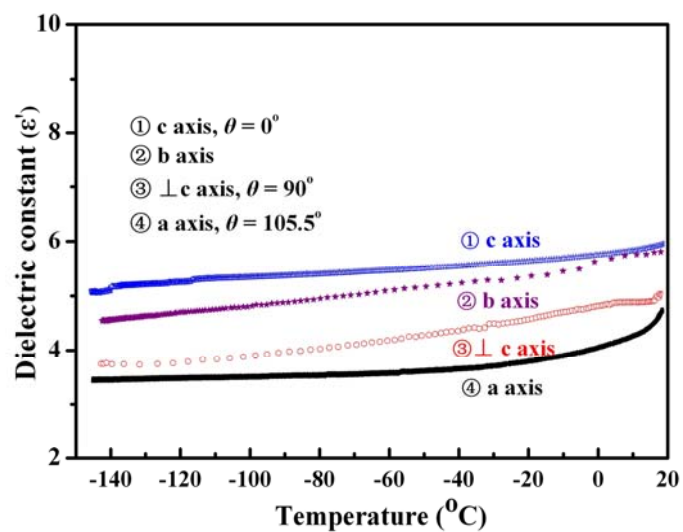

Figure S6. Dielectric constant vs temperature along different crystallographic directions at 1 MHz.
